# Supplementary material for: Organoselenium Compounds as Novel Adjuvants of Chemotherapy Drugs—A Promising Approach to Fight Cancer Drug Resistance
Source: PubMed Central journal article supplement (PMC6359065; doi:10.3390/molecules24020336), 2019-01-18
Supplement: molecules-24-00336-s001.pdf [file molecules-24-00336-s001.pdf]

# Organoselenium compounds as novel adjuvants of chemotherapy drugs: a promising approach to fight cancer drug resistance.

Gabriella Spengler<sup>1,†</sup>, Márió Gajdács<sup>1,†</sup>, Małgorzata Anna Marć<sup>2</sup>, Enrique Domínguez-Álvarez<sup>3\*</sup>, Carmen Sanmartín<sup>4,5\*</sup>

- 1 Department of Medical Microbiology and Immunobiology, Faculty of Medicine, University of Szeged;
- 2 Interdisciplinary Excellence Centre, Department of Inorganic and Analytical Chemistry, University of Szeged
- 3 Instituto de Química Orgánica General, Consejo Superior de Investigaciones Científicas (IQOG-CSIC), Madrid, Spain
- 4 Department of Pharmaceutical Technology and Chemistry, School of Pharmacy and Nutrition, University of Navarra, Pamplona, Spain
- 5 Instituto de Investigaciones Sanitarias de Navarra (IdiSNA), Pamplona, Spain

## Supplementary Material

### Contents:

1. Chemotherapeutic agents and selenocompounds tested (Tables S1 and S2, respectively).
2. Interactions between selenocompounds and each different chemotherapeutic drug evaluated (Tables S3-S10)
3. Arrangement of 96-well microtiter plates for checkerboard combination assay (Figure S1).
4. <sup>1</sup>H-NMR spectra of selected compounds (Figures S2-S5).
5. <sup>13</sup>C-NMR spectra of selected compounds (Figures S6-S9).

**Table S1.:** Chemotherapeutic agents tested: stock solutions and final concentrations.

| Reference drug                | Mechanism of action                                                                                                                      | Concentration of stock solution | Final concentration in the combination assay |
|-------------------------------|------------------------------------------------------------------------------------------------------------------------------------------|---------------------------------|----------------------------------------------|
| <b>Topotecan (Topo)</b>       | <i>Topoisomerase-I-inhibitor</i>                                                                                                         | 1.0 mg/mL                       | 0.024 $\mu$ M                                |
| <b>Doxorubicin (Dox)</b>      | <i>Topoisomerase-II-inhibitor,<br/>ROS species generation</i>                                                                            | 2.0 mg/mL                       | 17.242 $\mu$ M                               |
| <b>Vincristine (Vin)</b>      | <i>Inhibition of microtubule formation</i>                                                                                               | 1.0 mg/mL                       | 36.363 $\mu$ M                               |
| <b>Cisplatin (Cis)</b>        | <i>Alkylating-like agent<br/>(interstrand and intrastrand cross-links<br/>with purine bases at 1,2-positions within<br/>DNA strands)</i> | 0.5 mg/mL                       | 33.333 $\mu$ M                               |
| <b>Cyclophosphamide (Cpm)</b> | <i>Alkylating agent<br/>(interstrand and intrastrand cross-links<br/>at N-7 position within DNA strands)</i>                             | 25 mg/mL                        | 250.000 $\mu$ M                              |
| <b>5-fluorouracil (5-FU)</b>  | <i>Pyrimidine-antagonist</i>                                                                                                             | 50.0 mg/mL                      | 0.192 $\mu$ M                                |
| <b>Methotrexate (Mtx)</b>     | <i>Purine-antagonist</i>                                                                                                                 | 10.0 mg/mL                      | 11.000 $\mu$ M                               |
| <b>Verapamil (Ver)</b>        | <i>Efflux pump inhibitor<br/>(Ca<sup>2+</sup>-channel blocker)</i>                                                                       | 2.5 mg/mL                       | 200.000 $\mu$ M                              |

**Table S2.:** Selenocompounds tested in combination assay: stock solutions and final concentrations.

| Tested compounds | Concentration of stock solution | Final concentration in the combination assay |
|------------------|---------------------------------|----------------------------------------------|
| 1                |                                 | 25.0 $\mu$ M                                 |
| 2                |                                 | 25.0 $\mu$ M                                 |
| 3                |                                 | 50.0 $\mu$ M                                 |
| 4                |                                 | 100.0 $\mu$ M                                |
| 5                |                                 | 100.0 $\mu$ M                                |
| 6                |                                 | 100.0 $\mu$ M                                |
| 7                |                                 | 100.0 $\mu$ M                                |
| 8                | 10 mM                           | 100.0 $\mu$ M                                |
| 9                |                                 | 10.0 $\mu$ M                                 |
| 10               |                                 | 10.0 $\mu$ M                                 |
| 11               |                                 | 10.0 $\mu$ M                                 |
| 12               |                                 | 100.0 $\mu$ M                                |
| 13               |                                 | 100.0 $\mu$ M                                |
| 14               |                                 | 100.0 $\mu$ M                                |
| 15               |                                 | 100.0 $\mu$ M                                |

**Table S3.** Interactions between selenocompounds and topotecan (*Topo*) against multidrug resistant mouse T-lymphoma cells

| Compound | Ratio [ $\mu$ M]<br>( <i>Topo</i> : <i>Se</i> ) | CI   | SD $\pm$ | Type of interaction       |
|----------|-------------------------------------------------|------|----------|---------------------------|
| 1        | 0.006 : 12.500                                  | 1.19 | 0.07     | Slight antagonism         |
| 2        | 0.006 : 12.500                                  | 0.78 | 0.10     | <b>Moderate synergism</b> |
| 3        | 0.0015 : 12.5000                                | 1.76 | 0.28     | Antagonism                |
| 4        | 0.003 : 50.000                                  | 0.72 | 0.11     | <b>Moderate synergism</b> |
| 5        | 0.0015 : 25.0000                                | 0.95 | 0.12     | <i>Additive effect</i>    |
| 6        | 0.006 : 100.000                                 | 1.84 | 0.26     | Antagonism                |
| 7        | 0.006 : 50.000                                  | 1.26 | 0.08     | Moderate antagonism       |
| 8        | 0.0015 : 50.0000                                | 1.24 | 0.10     | Moderate antagonism       |
| 9        | 0.024 : 1.250                                   | 0.49 | 0.21     | <b>Synergism</b>          |
| 10       | 0.0015 : 1.2500                                 | 0.51 | 0.13     | <b>Synergism</b>          |
| 11       | 0.0015 : 2.5000                                 | 0.77 | 0.09     | <b>Moderate synergism</b> |
| 12       | 0.0015 : 25.000                                 | 0.41 | 0.06     | <b>Synergism</b>          |
| 13       | 0.003 : 100.000                                 | 0.68 | 0.08     | <b>Synergism</b>          |
| 14       | 0.0015 : 100.0000                               | 0.74 | 0.06     | <b>Moderate synergism</b> |
| 15       | 0.003 : 50.000                                  | 1.22 | 0.06     | Moderate antagonism       |

**Table S4.** Interactions between selenocompounds and doxorubicin (*Dox*) against multidrug resistant mouse T-lymphoma cells

| Compound | Ratio [ $\mu$ M]<br>( <i>Doxo</i> : <i>Se</i> ) | CI   | SD $\pm$ | Type of interaction       |
|----------|-------------------------------------------------|------|----------|---------------------------|
| 1        | 1 : 5                                           | 0.64 | 0.20     | <b>Synergism</b>          |
| 2        | 1 : 50                                          | 0.42 | 0.08     | <b>Synergism</b>          |
| 3        | 1 : 12.5                                        | 0.53 | 0.09     | <b>Synergism</b>          |
| 4        | 8 : 50                                          | 1.03 | 0.09     | <i>Additive effect</i>    |
| 5        | 2 : 100                                         | 0.61 | 0.09     | <b>Synergism</b>          |
| 6        | 4 : 25                                          | 0.88 | 0.06     | <b>Slight synergism</b>   |
| 7        | 2 : 50                                          | 1.48 | 0.31     | Antagonism                |
| 8        | 8 : 50                                          | 1.15 | 0.02     | Slight antagonism         |
| 9        | 1 : 2.5                                         | 0.81 | 0.14     | <b>Moderate synergism</b> |
| 10       | 1 : 2.5                                         | 0.83 | 0.07     | <b>Moderate synergism</b> |
| 11       | 2 : 2.5                                         | 1.04 | 0.13     | <i>Additive effect</i>    |
| 12       | 1 : 100                                         | 1.04 | 0.04     | <i>Additive effect</i>    |
| 13       | 2 : 25                                          | 0.47 | 0.22     | <b>Synergism</b>          |
| 14       | 0.5 : 25                                        | 2.63 | 0.54     | Antagonism                |
| 15       | 1 : 100                                         | 0.97 | 0.08     | <i>Additive effect</i>    |

**Table S5.** Interactions between selenocompounds and vincristine (Vin) against multidrug resistant mouse T-lymphoma cells

| Compound | Ratio [ $\mu$ M]<br>(Vin : Se) | CI   | SD $\pm$ | Type of interaction       |
|----------|--------------------------------|------|----------|---------------------------|
| 1        | 2.273 : 12.500                 | 0.57 | 0.15     | <b>Synergism</b>          |
| 2        | 9.091 : 12.500                 | 0.20 | 0.01     | <b>Strong synergism</b>   |
| 3        | 18.182 : 12.500                | 0.46 | 0.15     | <b>Synergism</b>          |
| 4        | 9.091 : 6.250                  | 0.27 | 0.07     | <b>Strong synergism</b>   |
| 5        | 4.545 : 50.000                 | 0.51 | 0.09     | <b>Synergism</b>          |
| 6        | 2.273 : 100.000                | 1.26 | 0.14     | Moderate antagonism       |
| 7        | 4.545 : 25.000                 | 0.58 | 0.11     | <b>Synergism</b>          |
| 8        | 4.545 : 25.000                 | 0.80 | 0.06     | <b>Moderate synergism</b> |
| 9        | 1.136 : 1.250                  | 0.39 | 0.01     | <b>Synergism</b>          |
| 10       | 1.136 : 1.250                  | 0.78 | 0.13     | <b>Moderate synergism</b> |
| 11       | 4.545 : 2.500                  | 0.56 | 0.13     | <b>Synergism</b>          |
| 12       | 2.273 : 100.000                | 0.68 | 0.10     | <b>Synergism</b>          |
| 13       | 2.273 : 100.000                | 1.16 | 0.04     | Slight antagonism         |
| 14       | 2.273 : 50.000                 | 0.70 | 0.13     | <b>Moderate synergism</b> |
| 15       | 9.091 : 50.000                 | 0.36 | 0.08     | <b>Synergism</b>          |

**Table S6.** Interactions between selenocompounds and cisplatin (Cis) against multidrug resistant mouse T-lymphoma cells

| Compound | Ratio [ $\mu$ M]<br>(Cis : Se) | CI   | SD $\pm$ | Type of interaction    |
|----------|--------------------------------|------|----------|------------------------|
| 1        | 4.16 : 25.00                   | 1.26 | 0.11     | Moderate antagonism    |
| 2        | 4.16 : 100.00                  | 0.96 | 0.04     | <i>Additive effect</i> |
| 3        | 1.04 : 6.25                    | 1.31 | 0.07     | Moderate antagonism    |
| 4        | 1.04 : 12.50                   | 4.09 | 0.25     | Strong antagonism      |
| 5        | 4.16 : 100.00                  | 1.01 | 0.08     | <i>Additive effect</i> |
| 6        | 8.33 : 100.00                  | 0.99 | 0.10     | <i>Additive effect</i> |
| 7        | 33.33 : 25.00                  | 1.56 | 0.19     | Antagonism             |
| 8        | 8.33 : 100.00                  | 2.25 | 0.16     | Antagonism             |
| 9        | 4.16 : 1.25                    | 2.17 | 0.28     | Antagonism             |
| 10       | 2.08 : 2.50                    | 1.03 | 0.03     | <i>Additive effect</i> |
| 11       | 8.33 : 1.25                    | 1.21 | 0.17     | Slight antagonism      |
| 12       | 8.33 : 25.00                   | 1.42 | 0.17     | Moderate antagonism    |
| 13       | 8.33 : 50.00                   | 1.28 | 0.22     | Moderate antagonism    |
| 14       | 2.08 : 100.00                  | 1.39 | 0.14     | Moderate antagonism    |
| 15       | 33.33 : 50.00                  | 1.10 | 0.08     | <i>Additive effect</i> |

**Table S7.** Interactions between selenocompounds and cyclophosphamide (*Cpm*) against multidrug resistant mouse T-lymphoma cells

| Compound | Ratio [ $\mu$ M]<br>( <i>Cpm</i> : Se) | CI   | SD $\pm$ | Type of interaction    |
|----------|----------------------------------------|------|----------|------------------------|
| 1        | 125 : 6.25                             | 1.40 | 0.16     | Moderate antagonism    |
| 2        | 125 : 12.5                             | 0.67 | 0.17     | <b>Synergism</b>       |
| 3        | 125 : 12.5                             | 0.61 | 0.16     | <b>Synergism</b>       |
| 4        | 125 : 12.5                             | 1.08 | 0.06     | <i>Additive effect</i> |
| 5        | 62.5 : 50                              | 0.64 | 0.11     | <b>Synergism</b>       |
| 6        | 62.5 : 50                              | 1.39 | 0.16     | Moderate antagonism    |
| 7        | 125 : 25                               | 0.71 | 0.11     | Moderate synergism     |
| 8        | 125 : 100                              | 0.63 | 0.02     | <b>Synergism</b>       |
| 9        | 125 : 2.5                              | 0.75 | 0.10     | Moderate synergism     |
| 10       | 125 : 2.5                              | 1.43 | 0.14     | Moderate antagonism    |
| 11       | 125 : 1.25                             | 1.31 | 0.11     | Moderate antagonism    |
| 12       | 125 : 25                               | 1.55 | 0.08     | Antagonism             |
| 13       | 125 : 100                              | 1.58 | 0.39     | Antagonism             |
| 14       | 62.5 : 100                             | 1.39 | 0.25     | Moderate antagonism    |
| 15       | 125 : 100                              | 1.85 | 0.20     | Antagonism             |

**Table S8.** Interactions between selenocompounds and methotrexate (*Met*) against multidrug resistant (MDR) mouse T-lymphoma cells

| Compound | Ratio [ $\mu$ M]<br>( <i>Met</i> : Se) | CI   | SD $\pm$ | Type of interaction       |
|----------|----------------------------------------|------|----------|---------------------------|
| 1        | 0.6875:50                              | 2.03 | 0.46     | Antagonism                |
| 2        | 11:12.5                                | 0.36 | 0.05     | <b>Synergism</b>          |
| 3        | 2.75:25                                | 0.71 | 0.02     | <b>Moderate synergism</b> |
| 4        | 1.375:25                               | 0.71 | 0.16     | <b>Moderate synergism</b> |
| 5        | 0.6875:100                             | 0.48 | 0.09     | <b>Synergism</b>          |
| 6        | 5.5:100                                | 1.40 | 0.16     | <b>Slight synergism</b>   |
| 7        | 1.375:100                              | 1.36 | 0.21     | Moderate antagonism       |
| 8        | 1.375:100                              | 0.68 | 0.16     | <b>Synergism</b>          |
| 9        | 1.375:1.25                             | 3.24 | 0.42     | Antagonism                |
| 10       | 11:2.5                                 | 2.41 | 0.33     | Antagonism                |
| 11       | 0.3438:1.25                            | 2.26 | 0.39     | Antagonism                |
| 12       | 5.5:12.5                               | 1.34 | 0.13     | Moderate antagonism       |
| 13       | 0.6875:12.5                            | 0.59 | 0.05     | <b>Synergism</b>          |
| 14       | 1.375:12.5                             | 0.39 | 0.14     | <b>Synergism</b>          |
| 15       | 1.375:25                               | 1.33 | 0.09     | Moderate antagonism       |

**Table S9.** Interactions between selenocompounds and 5-fluorouracil (*5-FU*) against multidrug resistant mouse T-lymphoma cells

| Compound | Ratio [ $\mu$ M]<br>( <i>5-FU</i> : Se) | CI   | SD $\pm$ | Type of interaction       |
|----------|-----------------------------------------|------|----------|---------------------------|
| 1        | 0.012 : 6.250                           | 0.97 | 0.05     | <i>Additive effect</i>    |
| 2        | 0.024 : 100.000                         | 0.77 | 0.03     | <b>Moderate synergism</b> |
| 3        | 0.024 : 25.000                          | 1.48 | 0.22     | Antagonism                |
| 4        | 0.096 : 50.000                          | 0.48 | 0.05     | <b>Synergism</b>          |
| 5        | 0.024 : 100.000                         | 0.42 | 0.14     | <b>Synergism</b>          |
| 6        | 0.012 : 100.000                         | 0.68 | 0.20     | <b>Synergism</b>          |
| 7        | 0.012 : 100.000                         | 0.83 | 0.07     | <b>Moderate synergism</b> |
| 8        | 0.024 : 50.000                          | 1.34 | 0.11     | Moderate antagonism       |
| 9        | 0.096 : 1.250                           | 2.81 | 0.29     | Antagonism                |
| 10       | 0.048 : 1.250                           | 2.54 | 0.48     | Antagonism                |
| 11       | 0.096 : 1.250                           | 2.01 | 0.41     | Antagonism                |
| 12       | 0.012 : 100.000                         | 0.46 | 0.18     | <b>Synergism</b>          |
| 13       | 0.012 : 100.000                         | 0.42 | 0.07     | <b>Synergism</b>          |
| 14       | 0.024 : 25.000                          | 0.69 | 0.14     | <b>Synergism</b>          |
| 15       | 0.012 : 100.000                         | 1.06 | 0.05     | <i>Additive effect</i>    |

**Table S10.** Interactions between selenocompounds and verapamil (*Ver*) against multidrug resistant mouse T-lymphoma cells

| Compound | Ratio [ $\mu$ M]<br>( <i>Ver</i> : Se) | CI   | SD $\pm$ | Type of interaction    |
|----------|----------------------------------------|------|----------|------------------------|
| 1        | 12.5 : 12.5                            | 1.67 | 0.28     | Antagonism             |
| 2        | 25 : 25                                | 0.67 | 0.09     | <b>Synergism</b>       |
| 3        | 12.5 : 25                              | 0.57 | 0.19     | <b>Synergism</b>       |
| 4        | 25 : 25                                | 1.05 | 0.03     | <i>Additive effect</i> |
| 5        | 6.25 : 25                              | 1.98 | 0.38     | Antagonism             |
| 6        | 50 : 100                               | 1.89 | 0.26     | Antagonism             |
| 7        | 12.5 : 50.0                            | 1.01 | 0.07     | <i>Additive effect</i> |
| 8        | 6.25 : 12.50                           | 2.30 | 0.54     | Antagonism             |
| 9        | 25.0 : 12.5                            | 1.41 | 0.13     | Moderate antagonism    |
| 10       | 50 : 5                                 | 1.56 | 0.29     | Antagonism             |
| 11       | 25 : 12.5                              | 1.73 | 0.30     | Antagonism             |
| 12       | 50 : 50                                | 1.18 | 0.04     | Slight antagonism      |
| 13       | 12.5 : 50                              | 1.43 | 0.12     | Moderate antagonism    |
| 14       | 12.5 : 50                              | 1.91 | 0.36     | Antagonism             |
| 15       | 25 : 100                               | 1.68 | 0.14     | Antagonism             |

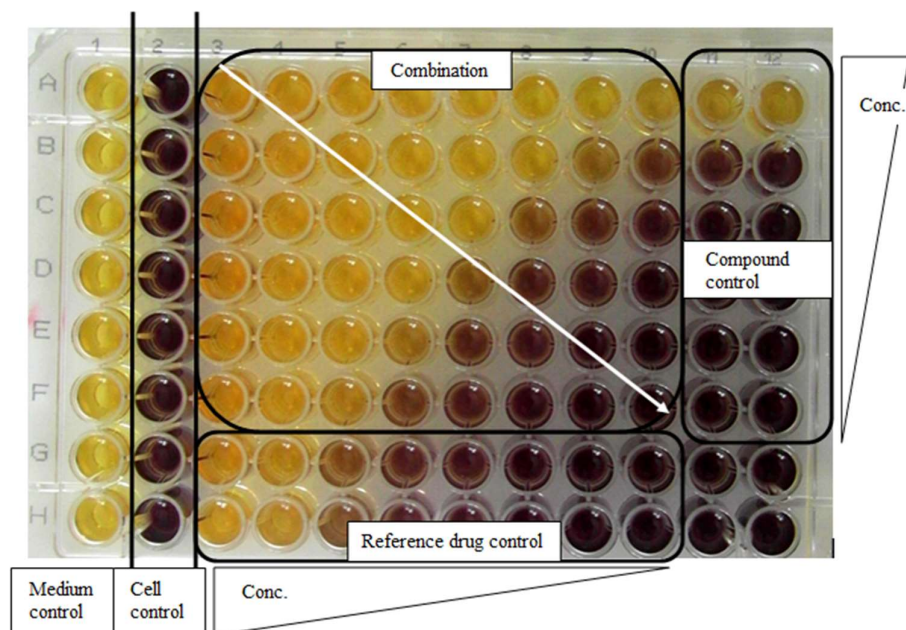

**Figure 1.** Arrangement of 96-well microtiter plates for checkerboard combination assay. The dilutions of the chemotherapeutic drugs (or verapamil) were made in a horizontal direction in 100  $\mu\text{L}$ , and the dilutions of the selenocompounds vertically in the microtiter plate in 50  $\mu\text{L}$  volume.

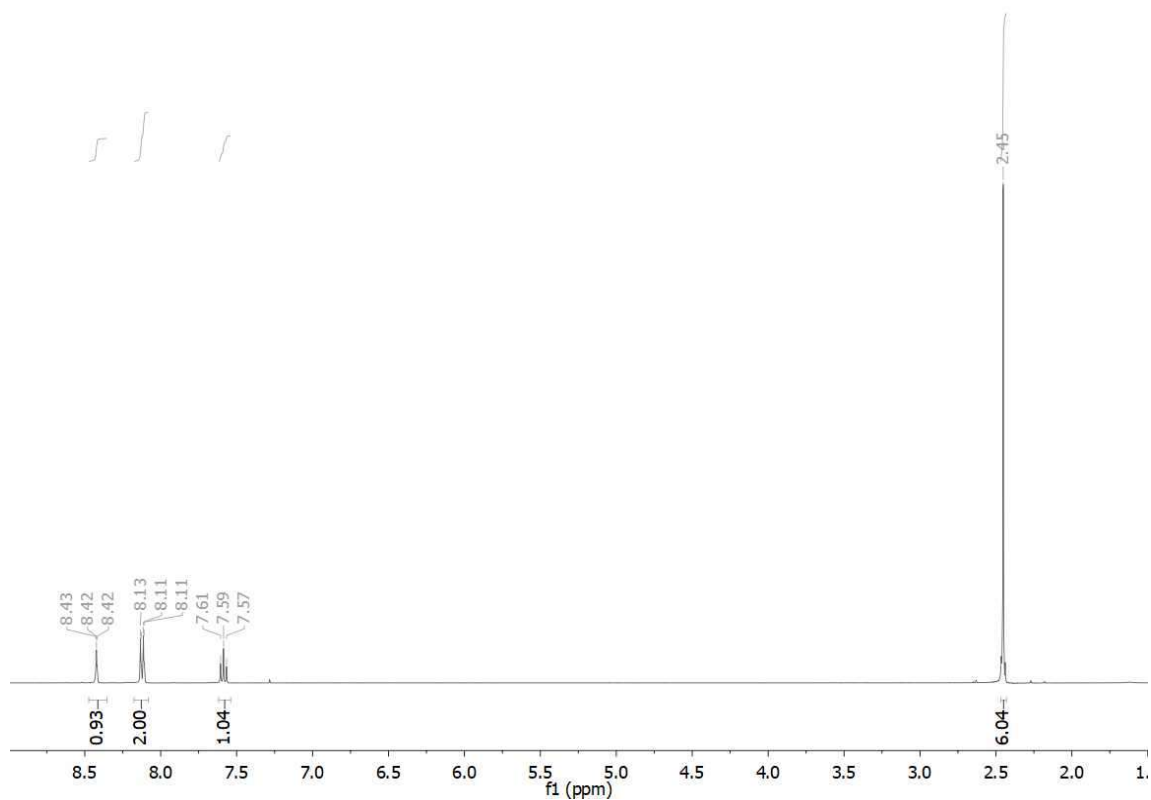

**Figure S2.**  $^1\text{H-NMR}$  of compound 4 in  $\text{CDCl}_3$ .

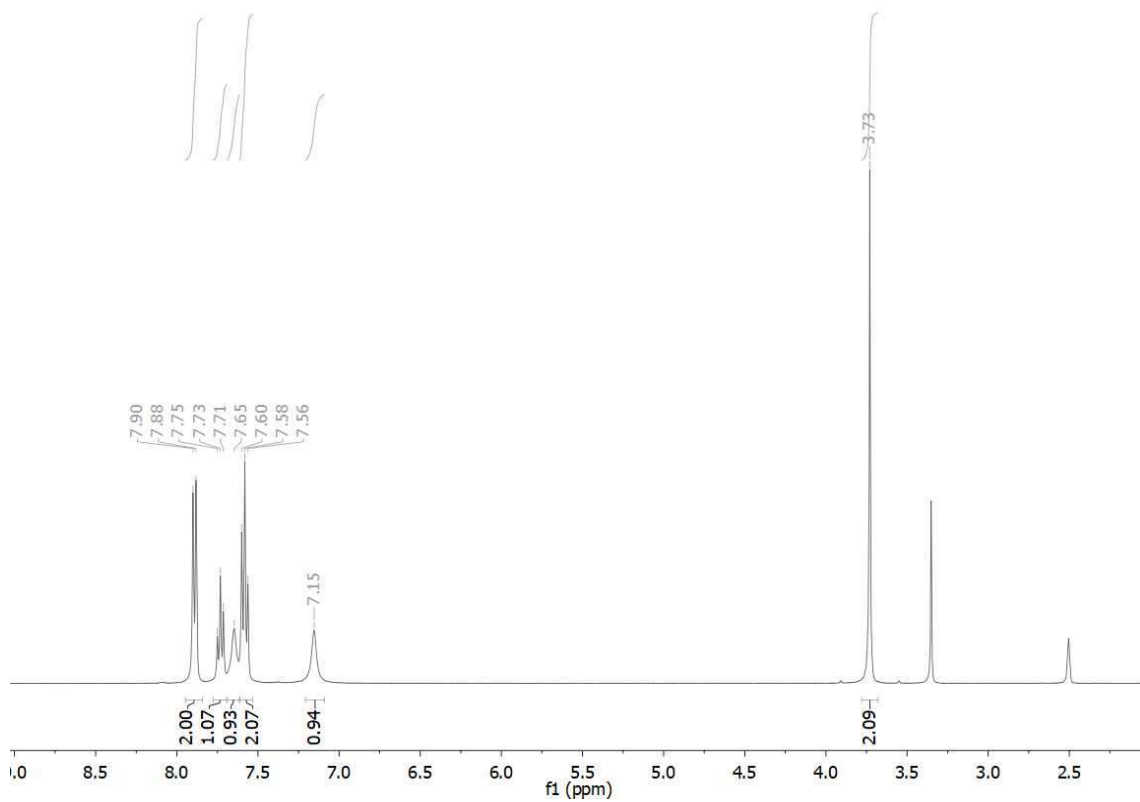

Figure S3. <sup>1</sup>H-NMR of compound 6 in DMSO-d<sub>6</sub>.

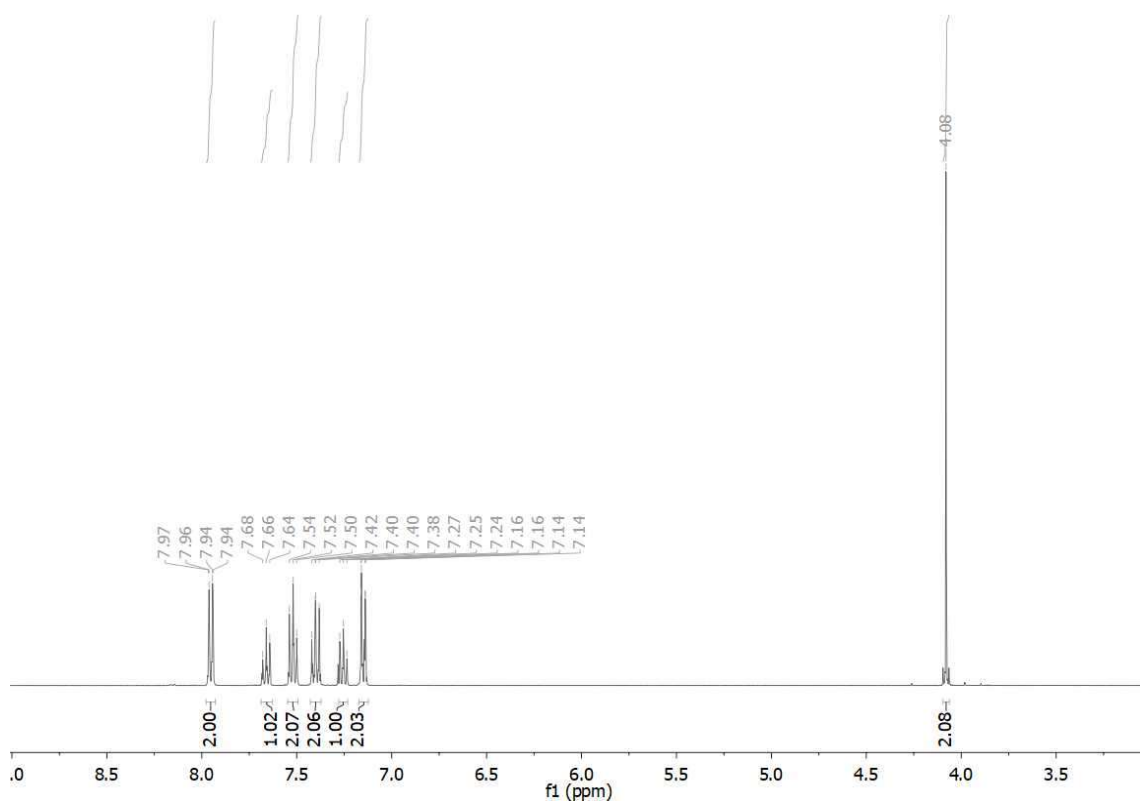

Figure S4. <sup>1</sup>H-NMR of compound 8 in CDCl<sub>3</sub>.



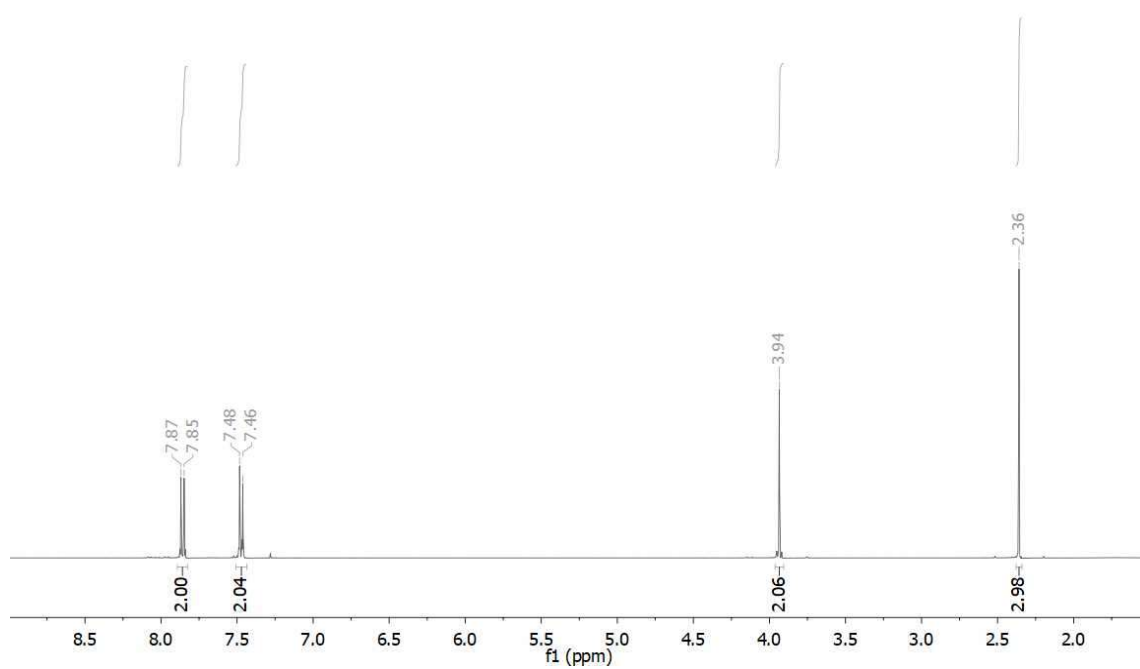

Figure S5. <sup>1</sup>H-NMR of compound 9 in CDCl<sub>3</sub>.

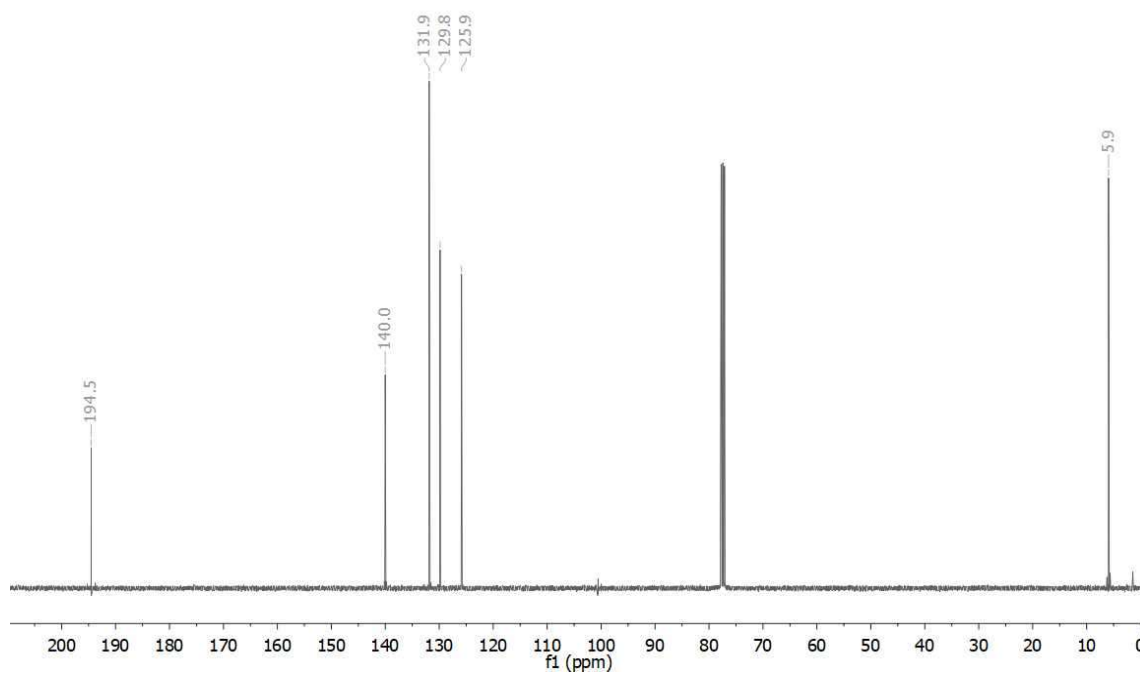

Figure S6. <sup>13</sup>C-NMR of compound 4 in CDCl<sub>3</sub>.

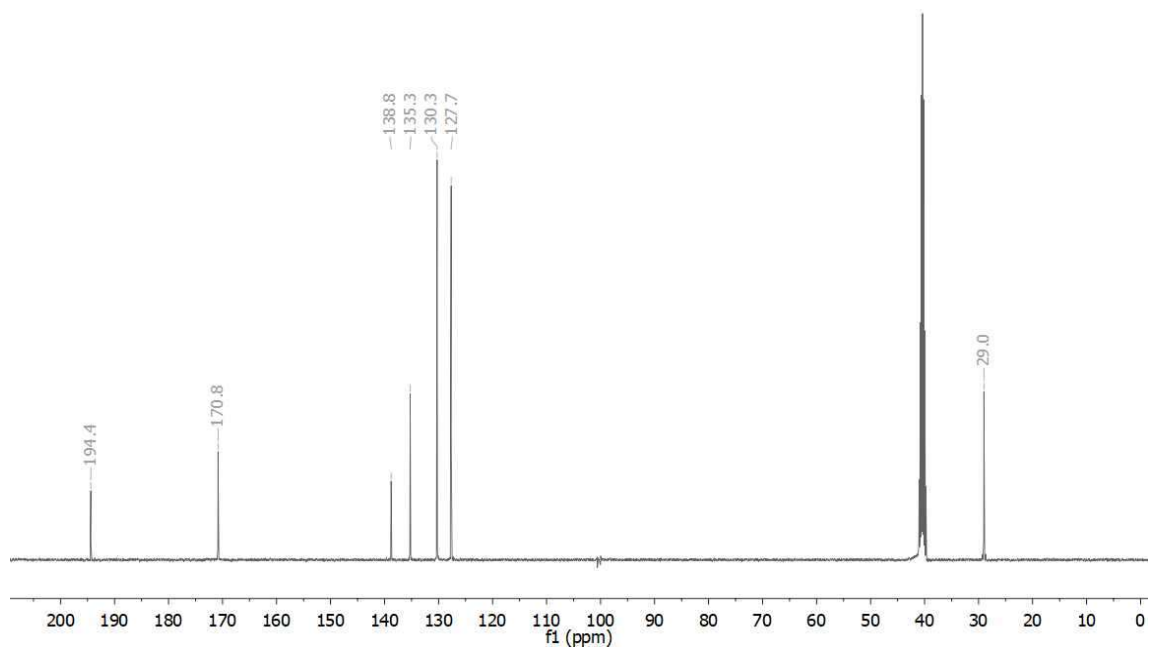

Figure S7. <sup>13</sup>C-NMR of compound 6 in DMSO-d<sub>6</sub>.

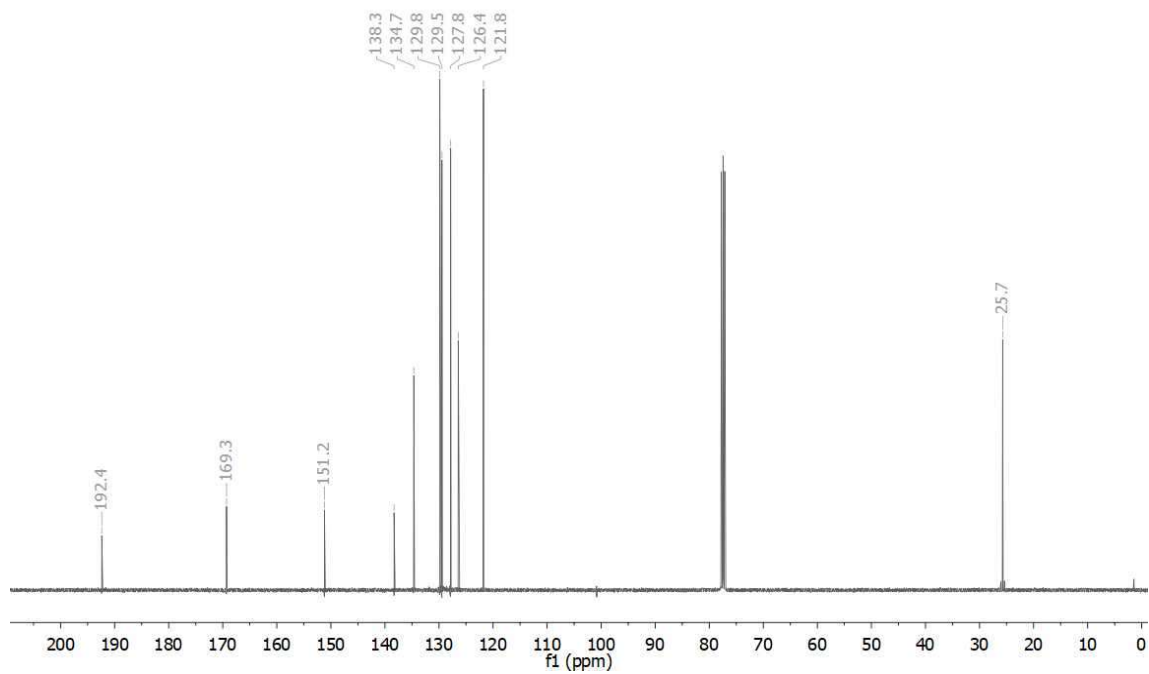

Figure S8. <sup>13</sup>C-NMR of compound 8 in CDCl<sub>3</sub>.

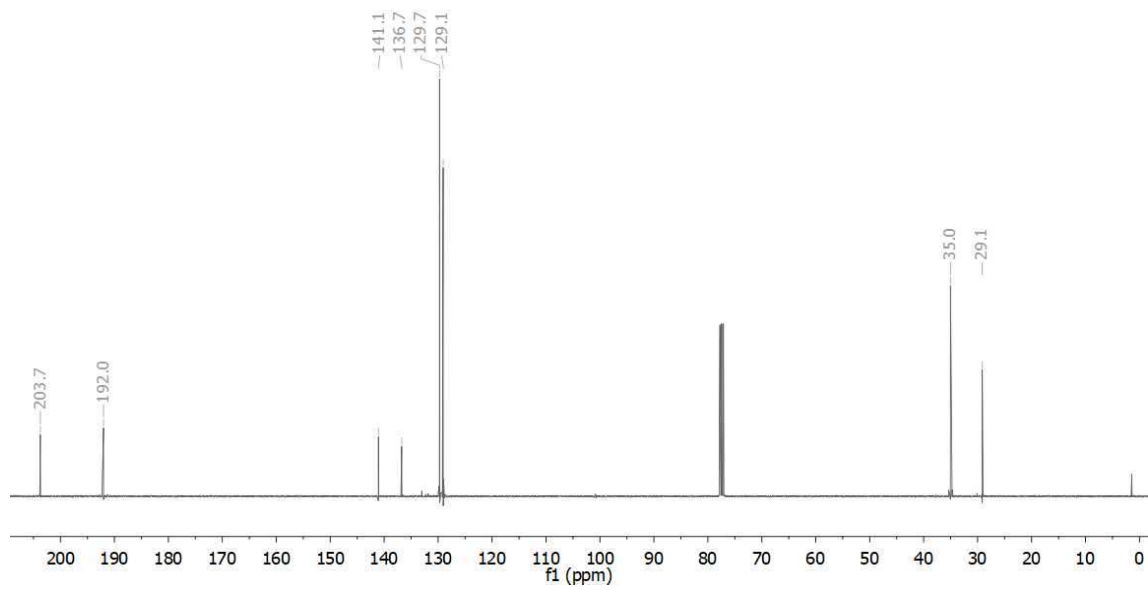

**Figure S9.** <sup>13</sup>C-NMR of compound 9 in CDCl<sub>3</sub>.
